# Supplementary material for: Phase 1 dose-escalation study of SEA-CD40: a non-fucosylated CD40 agonist, in advanced solid tumors and lymphomas
Source: PubMed Central journal article supplement — J Immunother Cancer. 2023 Jun 29;11(6):e005584. doi: 10.1136/jitc-2022-005584 (PMC10314623; doi:10.1136/jitc-2022-005584), 2023-06-29
Supplement: jitc-2022-005584supp001.pdf [file jitc-2022-005584supp001.pdf]

**DATA SUPPLEMENT****Phase 1 Dose-Escalation Study of SEA-CD40, a Nonfucosylated CD40 Agonist, in Advanced Solid Tumors and Lymphomas**

Andrew L. Coveler<sup>1</sup>, David C. Smith<sup>2</sup>, Tycel Phillips<sup>2</sup>, Brendan Curti<sup>3</sup>, Sanjay Goel<sup>4</sup>, Amitkumar N. Mehta<sup>5</sup>, Timothy M. Kuzel<sup>6</sup>, Svetomir N. Markovic<sup>7</sup>, Olivier Rixe<sup>8</sup>, David L. Bajor<sup>9</sup>, Thomas F. Gajewski<sup>10</sup>, Martin Gutierrez<sup>11</sup>, Hun Ju Lee<sup>12</sup>, Ajay K. Gopal<sup>1</sup>, Paolo Caimi<sup>9</sup>, Elisabeth I. Heath<sup>13</sup>, John A. Thompson<sup>1</sup>, Sahar Ansari<sup>14</sup>, Celine Jacquemont<sup>15</sup>, Ariel Topletz-Erickson<sup>14</sup>, Peigen Zhou<sup>14</sup>, Michael W. Schmitt<sup>14</sup>, Juneko E. Grilley-Olson<sup>15</sup>

<sup>1</sup>Fred Hutchinson Cancer Center /University of Washington, Seattle, WA; <sup>2</sup>University of Michigan, Ann Arbor, MI; <sup>3</sup>Providence Cancer Institute, Portland, OR; <sup>4</sup>Montefiore Medical Center, Albert Einstein College of Medicine, Bronx, NY; <sup>5</sup>University of Alabama at Birmingham, Birmingham, AL; <sup>6</sup>Rush University Medical Center, Chicago, IL; <sup>7</sup>Mayo Clinic Minnesota, Rochester, MN; <sup>8</sup>University of New Mexico Comprehensive Cancer Center, Albuquerque, NM; <sup>9</sup>Case Western Reserve University/University Hospitals Cleveland Medical Center, Cleveland, OH; <sup>10</sup>University of Chicago Medical Center, Chicago, IL; <sup>11</sup>Hackensack University Medical Center, Hackensack, NJ; <sup>12</sup>University of Texas MD Anderson Cancer Center, Houston, TX; <sup>13</sup>Karmanos Cancer Institute, Detroit, MI; <sup>14</sup>Seagen Inc., Bothell, WA, <sup>15</sup>Duke Cancer Institute/Duke University, Durham, NC

## SUPPLEMENTARY TABLES AND FIGURES

**Table S1: Treatment-emergent adverse events reported in ≥15% of patients in any treatment group**

| Preferred Term<br>Severity       | 0.6 µg/kg<br>(N=1)<br>n (%) | 3 µg/kg<br>(N=1)<br>n (%) | 10 µg/kg<br>(N=7)<br>n (%) | 30 µg/kg<br>(N=24)<br>n (%) | 45 µg/kg<br>(N=9)<br>n (%) | 60 µg/kg<br>(N=13)<br>n (%) | 30 µg/kg <sup>a</sup><br>(N=12)<br>n (%) | Total<br>(N=67)<br>n (%) |
|----------------------------------|-----------------------------|---------------------------|----------------------------|-----------------------------|----------------------------|-----------------------------|------------------------------------------|--------------------------|
| <b>Any event</b>                 | 1 (100)                     | 1 (100)                   | 7 (100)                    | 24 (100)                    | 9 (100)                    | 13 (100)                    | 11 (92)                                  | 66 (99)                  |
| Grade 1                          | 0                           | 0                         | 0                          | 0                           | 1 (11)                     | 0                           | 0                                        | 1 (1)                    |
| Grade 2                          | 0                           | 0                         | 2 (29)                     | 8 (33)                      | 1 (11)                     | 2 (15)                      | 4 (33)                                   | 17 (25)                  |
| Grade 3                          | 1 (100)                     | 1 (100)                   | 2 (29)                     | 11 (46)                     | 5 (56)                     | 9 (69)                      | 3 (25)                                   | 32 (48)                  |
| Grade 4                          | 0                           | 0                         | 2 (29)                     | 3 (13)                      | 2 (22)                     | 1 (8)                       | 1 (8)                                    | 9 (13)                   |
| Grade 5                          | 0                           | 0                         | 1 (14)                     | 2 (8)                       | 0                          | 1 (8)                       | 3 (25)                                   | 7 (10)                   |
|                                  |                             |                           |                            |                             |                            |                             |                                          |                          |
| <b>Infusion related reaction</b> | 0                           | 0                         | 6 (86)                     | 20 (83)                     | 8 (89)                     | 7 (54)                      | 6 (50)                                   | 47 (70)                  |
| Grade 1                          | 0                           | 0                         | 1 (14)                     | 4 (17)                      | 2 (22)                     | 1 (8)                       | 3 (25)                                   | 11 (16)                  |
| Grade 2                          | 0                           | 0                         | 4 (57)                     | 15 (63)                     | 4 (44)                     | 3 (23)                      | 3 (25)                                   | 29 (43)                  |
| Grade 3                          | 0                           | 0                         | 1 (14)                     | 1 (4)                       | 2 (22)                     | 3 (23)                      | 0                                        | 7 (10)                   |
|                                  |                             |                           |                            |                             |                            |                             |                                          |                          |
| <b>Chills</b>                    | 0                           | 0                         | 5 (71)                     | 16 (67)                     | 6 (67)                     | 7 (54)                      | 6 (50)                                   | 40 (60)                  |
| Grade 1                          | 0                           | 0                         | 2 (29)                     | 7 (29)                      | 2 (22)                     | 2 (15)                      | 3 (25)                                   | 16 (24)                  |
| Grade 2                          | 0                           | 0                         | 3 (43)                     | 8 (33)                      | 4 (44)                     | 5 (38)                      | 3 (25)                                   | 23 (34)                  |
| Grade 3                          | 0                           | 0                         | 0                          | 1 (4)                       | 0                          | 0                           | 0                                        | 1 (1)                    |
|                                  |                             |                           |                            |                             |                            |                             |                                          |                          |
| <b>Nausea</b>                    | 0                           | 0                         | 6 (86)                     | 16 (67)                     | 5 (56)                     | 7 (54)                      | 5 (42)                                   | 39 (58)                  |

| Preferred Term<br>Severity | 0.6 µg/kg<br>(N=1)<br>n (%) | 3 µg/kg<br>(N=1)<br>n (%) | 10 µg/kg<br>(N=7)<br>n (%) | 30 µg/kg<br>(N=24)<br>n (%) | 45 µg/kg<br>(N=9)<br>n (%) | 60 µg/kg<br>(N=13)<br>n (%) | 30 µg/kg <sup>a</sup><br>(N=12)<br>n (%) | Total<br>(N=67)<br>n (%) |
|----------------------------|-----------------------------|---------------------------|----------------------------|-----------------------------|----------------------------|-----------------------------|------------------------------------------|--------------------------|
| Grade 1                    | 0                           | 0                         | 1 (14)                     | 10 (42)                     | 3 (33)                     | 3 (23)                      | 3 (25)                                   | 20 (30)                  |
| Grade 2                    | 0                           | 0                         | 5 (71)                     | 6 (25)                      | 2 (22)                     | 4 (31)                      | 2 (17)                                   | 19 (28)                  |
|                            |                             |                           |                            |                             |                            |                             |                                          |                          |
| <b>Fatigue</b>             | 1 (100)                     | 1 (100)                   | 3 (43)                     | 14 (58)                     | 4 (44)                     | 5 (38)                      | 7 (58)                                   | 35 (52)                  |
| Grade 1                    | 1 (100)                     | 0                         | 2 (29)                     | 2 (8)                       | 1 (11)                     | 1 (8)                       | 4 (33)                                   | 11 (16)                  |
| Grade 2                    | 0                           | 1 (100)                   | 1 (14)                     | 10 (42)                     | 3 (33)                     | 3 (23)                      | 2 (17)                                   | 20 (30)                  |
| Grade 3                    | 0                           | 0                         | 0                          | 2 (8)                       | 0                          | 1 (8)                       | 1 (8)                                    | 4 (6)                    |
|                            |                             |                           |                            |                             |                            |                             |                                          |                          |
| <b>Vomiting</b>            | 0                           | 0                         | 4 (57)                     | 11 (46)                     | 2 (22)                     | 5 (38)                      | 4 (33)                                   | 26 (39)                  |
| Grade 1                    | 0                           | 0                         | 2 (29)                     | 10 (42)                     | 1 (11)                     | 1 (8)                       | 3 (25)                                   | 17 (25)                  |
| Grade 2                    | 0                           | 0                         | 2 (29)                     | 1 (4)                       | 1 (11)                     | 2 (15)                      | 1 (8)                                    | 7 (10)                   |
| Grade 3                    | 0                           | 0                         | 0                          | 0                           | 0                          | 2 (15)                      | 0                                        | 2 (3)                    |
|                            |                             |                           |                            |                             |                            |                             |                                          |                          |
| <b>Anaemia</b>             | 0                           | 0                         | 2 (29)                     | 8 (33)                      | 3 (33)                     | 6 (46)                      | 4 (33)                                   | 23 (34)                  |
| Grade 1                    | 0                           | 0                         | 1 (14)                     | 0                           | 0                          | 0                           | 2 (17)                                   | 3 (4)                    |
| Grade 2                    | 0                           | 0                         | 0                          | 3 (13)                      | 2 (22)                     | 1 (8)                       | 1 (8)                                    | 7 (10)                   |
| Grade 3                    | 0                           | 0                         | 1 (14)                     | 5 (21)                      | 1 (11)                     | 5 (38)                      | 1 (8)                                    | 13 (19)                  |
|                            |                             |                           |                            |                             |                            |                             |                                          |                          |
| <b>Hypotension</b>         | 0                           | 0                         | 1 (14)                     | 6 (25)                      | 6 (67)                     | 4 (31)                      | 4 (33)                                   | 21 (31)                  |
| Grade 1                    | 0                           | 0                         | 0                          | 1 (4)                       | 0                          | 1 (8)                       | 0                                        | 2 (3)                    |
| Grade 2                    | 0                           | 0                         | 1 (14)                     | 2 (8)                       | 5 (56)                     | 1 (8)                       | 4 (33)                                   | 13 (19)                  |
| Grade 3                    | 0                           | 0                         | 0                          | 3 (13)                      | 1 (11)                     | 1 (8)                       | 0                                        | 5 (7)                    |

| Preferred Term Severity | 0.6 µg/kg<br>(N=1)<br>n (%) | 3 µg/kg<br>(N=1)<br>n (%) | 10 µg/kg<br>(N=7)<br>n (%) | 30 µg/kg<br>(N=24)<br>n (%) | 45 µg/kg<br>(N=9)<br>n (%) | 60 µg/kg<br>(N=13)<br>n (%) | 30 µg/kg <sup>a</sup><br>(N=12)<br>n (%) | Total<br>(N=67)<br>n (%) |
|-------------------------|-----------------------------|---------------------------|----------------------------|-----------------------------|----------------------------|-----------------------------|------------------------------------------|--------------------------|
| Grade 4                 | 0                           | 0                         | 0                          | 0                           | 0                          | 1 (8)                       | 0                                        | 1 (1)                    |
| <b>Dyspnoea</b>         | 0                           | 0                         | 2 (29)                     | 9 (38)                      | 1 (11)                     | 4 (31)                      | 4 (33)                                   | 20 (30)                  |
| Grade 1                 | 0                           | 0                         | 1 (14)                     | 2 (8)                       | 0                          | 1 (8)                       | 0                                        | 4 (6)                    |
| Grade 2                 | 0                           | 0                         | 1 (14)                     | 6 (25)                      | 1 (11)                     | 1 (8)                       | 3 (25)                                   | 12 (18)                  |
| Grade 3                 | 0                           | 0                         | 0                          | 1 (4)                       | 0                          | 2 (15)                      | 1 (8)                                    | 4 (6)                    |
| <b>Headache</b>         | 0                           | 0                         | 3 (43)                     | 9 (38)                      | 2 (22)                     | 2 (15)                      | 3 (25)                                   | 19 (28)                  |
| Grade 1                 | 0                           | 0                         | 3 (43)                     | 5 (21)                      | 1 (11)                     | 2 (15)                      | 2 (17)                                   | 13 (19)                  |
| Grade 2                 | 0                           | 0                         | 0                          | 3 (13)                      | 1 (11)                     | 0                           | 1 (8)                                    | 5 (7)                    |
| Grade 3                 | 0                           | 0                         | 0                          | 1 (4)                       | 0                          | 0                           | 0                                        | 1 (1)                    |
| <b>Constipation</b>     | 1 (100)                     | 0                         | 2 (29)                     | 5 (21)                      | 2 (22)                     | 2 (15)                      | 4 (33)                                   | 16 (24)                  |
| Grade 1                 | 1 (100)                     | 0                         | 1 (14)                     | 5 (21)                      | 1 (11)                     | 1 (8)                       | 2 (17)                                   | 11 (16)                  |
| Grade 2                 | 0                           | 0                         | 1 (14)                     | 0                           | 0                          | 1 (8)                       | 2 (17)                                   | 4 (6)                    |
| Grade 3                 | 0                           | 0                         | 0                          | 0                           | 1 (11)                     | 0                           | 0                                        | 1 (1)                    |
| <b>Pyrexia</b>          | 0                           | 0                         | 0                          | 5 (21)                      | 3 (33)                     | 5 (38)                      | 3 (25)                                   | 16 (24)                  |
| Grade 1                 | 0                           | 0                         | 0                          | 4 (17)                      | 3 (33)                     | 3 (23)                      | 0                                        | 10 (15)                  |
| Grade 2                 | 0                           | 0                         | 0                          | 1 (4)                       | 0                          | 2 (15)                      | 3 (25)                                   | 6 (9)                    |
| <b>Back pain</b>        | 0                           | 0                         | 1 (14)                     | 2 (8)                       | 2 (22)                     | 6 (46)                      | 4 (33)                                   | 15 (22)                  |

| Preferred Term Severity   | 0.6 µg/kg<br>(N=1)<br>n (%) | 3 µg/kg<br>(N=1)<br>n (%) | 10 µg/kg<br>(N=7)<br>n (%) | 30 µg/kg<br>(N=24)<br>n (%) | 45 µg/kg<br>(N=9)<br>n (%) | 60 µg/kg<br>(N=13)<br>n (%) | 30 µg/kg <sup>a</sup><br>(N=12)<br>n (%) | Total<br>(N=67)<br>n (%) |
|---------------------------|-----------------------------|---------------------------|----------------------------|-----------------------------|----------------------------|-----------------------------|------------------------------------------|--------------------------|
| Grade 1                   | 0                           | 0                         | 0                          | 1 (4)                       | 2 (22)                     | 2 (15)                      | 3 (25)                                   | 8 (12)                   |
| Grade 2                   | 0                           | 0                         | 0                          | 0                           | 0                          | 4 (31)                      | 1 (8)                                    | 5 (7)                    |
| Grade 3                   | 0                           | 0                         | 1 (14)                     | 1 (4)                       | 0                          | 0                           | 0                                        | 2 (3)                    |
|                           |                             |                           |                            |                             |                            |                             |                                          |                          |
| <b>Oedema peripheral</b>  | 0                           | 0                         | 2 (29)                     | 6 (25)                      | 3 (33)                     | 2 (15)                      | 2 (17)                                   | 15 (22)                  |
| Grade 1                   | 0                           | 0                         | 1 (14)                     | 3 (13)                      | 3 (33)                     | 2 (15)                      | 0                                        | 9 (13)                   |
| Grade 2                   | 0                           | 0                         | 1 (14)                     | 2 (8)                       | 0                          | 0                           | 1 (8)                                    | 4 (6)                    |
| Grade 3                   | 0                           | 0                         | 0                          | 1 (4)                       | 0                          | 0                           | 1 (8)                                    | 2 (3)                    |
|                           |                             |                           |                            |                             |                            |                             |                                          |                          |
| <b>Tachycardia</b>        | 0                           | 0                         | 3 (43)                     | 5 (21)                      | 3 (33)                     | 2 (15)                      | 1 (8)                                    | 14 (21)                  |
| Grade 1                   | 0                           | 0                         | 3 (43)                     | 3 (13)                      | 2 (22)                     | 1 (8)                       | 1 (8)                                    | 10 (15)                  |
| Grade 2                   | 0                           | 0                         | 0                          | 2 (8)                       | 1 (11)                     | 0                           | 0                                        | 3 (4)                    |
| Grade 3                   | 0                           | 0                         | 0                          | 0                           | 0                          | 1 (8)                       | 0                                        | 1 (1)                    |
|                           |                             |                           |                            |                             |                            |                             |                                          |                          |
| <b>Abdominal pain</b>     | 0                           | 0                         | 2 (29)                     | 3 (13)                      | 1 (11)                     | 3 (23)                      | 4 (33)                                   | 13 (19)                  |
| Grade 1                   | 0                           | 0                         | 0                          | 0                           | 0                          | 2 (15)                      | 2 (17)                                   | 4 (6)                    |
| Grade 2                   | 0                           | 0                         | 1 (14)                     | 2 (8)                       | 1 (11)                     | 0                           | 2 (17)                                   | 6 (9)                    |
| Grade 3                   | 0                           | 0                         | 1 (14)                     | 1 (4)                       | 0                          | 1 (8)                       | 0                                        | 3 (4)                    |
|                           |                             |                           |                            |                             |                            |                             |                                          |                          |
| <b>Decreased appetite</b> | 0                           | 0                         | 0                          | 4 (17)                      | 2 (22)                     | 2 (15)                      | 5 (42)                                   | 13 (19)                  |
| Grade 1                   | 0                           | 0                         | 0                          | 1 (4)                       | 2 (22)                     | 1 (8)                       | 3 (25)                                   | 7 (10)                   |
| Grade 2                   | 0                           | 0                         | 0                          | 3 (13)                      | 0                          | 1 (8)                       | 2 (17)                                   | 6 (9)                    |

| Preferred Term Severity | 0.6 µg/kg<br>(N=1)<br>n (%) | 3 µg/kg<br>(N=1)<br>n (%) | 10 µg/kg<br>(N=7)<br>n (%) | 30 µg/kg<br>(N=24)<br>n (%) | 45 µg/kg<br>(N=9)<br>n (%) | 60 µg/kg<br>(N=13)<br>n (%) | 30 µg/kg <sup>a</sup><br>(N=12)<br>n (%) | Total<br>(N=67)<br>n (%) |
|-------------------------|-----------------------------|---------------------------|----------------------------|-----------------------------|----------------------------|-----------------------------|------------------------------------------|--------------------------|
| <b>Cough</b>            | 0                           | 0                         | 1 (14)                     | 3 (13)                      | 1 (11)                     | 4 (31)                      | 2 (17)                                   | 11 (16)                  |
| Grade 1                 | 0                           | 0                         | 1 (14)                     | 1 (4)                       | 1 (11)                     | 3 (23)                      | 1 (8)                                    | 7 (10)                   |
| Grade 2                 | 0                           | 0                         | 0                          | 2 (8)                       | 0                          | 0                           | 1 (8)                                    | 3 (4)                    |
| Grade 3                 | 0                           | 0                         | 0                          | 0                           | 0                          | 1 (8)                       | 0                                        | 1 (1)                    |
| <b>Dizziness</b>        | 1 (100)                     | 0                         | 2 (29)                     | 1 (4)                       | 2 (22)                     | 1 (8)                       | 3 (25)                                   | 10 (15)                  |
| Grade 1                 | 1 (100)                     | 0                         | 2 (29)                     | 1 (4)                       | 1 (11)                     | 1 (8)                       | 2 (17)                                   | 8 (12)                   |
| Grade 2                 | 0                           | 0                         | 0                          | 0                           | 1 (11)                     | 0                           | 0                                        | 1 (1)                    |
| Grade 3                 | 0                           | 0                         | 0                          | 0                           | 0                          | 0                           | 1 (8)                                    | 1 (1)                    |
| <b>Wheezing</b>         | 1 (100)                     | 0                         | 0                          | 3 (13)                      | 1 (11)                     | 4 (31)                      | 1 (8)                                    | 10 (15)                  |
| Grade 1                 | 1 (100)                     | 0                         | 0                          | 2 (8)                       | 1 (11)                     | 0                           | 1 (8)                                    | 5 (7)                    |
| Grade 2                 | 0                           | 0                         | 0                          | 1 (4)                       | 0                          | 3 (23)                      | 0                                        | 4 (6)                    |
| Grade 3                 | 0                           | 0                         | 0                          | 0                           | 0                          | 1 (8)                       | 0                                        | 1 (1)                    |

<sup>a</sup>Intensified dosing (Days 1 and 8 in Cycles 1 and 2, with Day 1 only in subsequent cycles)  
Preferred terms from MedDRA v17.1

**Supplementary Table S2: IHR-related adverse events in patients with solid tumors (Part A) and lymphomas (Part C)**

| Preferred Term<br>Severity       | 0.6 µg/kg<br>(N=1)<br>n (%) | 3 µg/kg<br>(N=1)<br>n (%) | 10 µg/kg<br>(N=7)<br>n (%) | 30 µg/kg<br>(N=24)<br>n (%) | 45 µg/kg<br>(N=9)<br>n (%) | 60 µg/kg<br>(N=13)<br>n (%) | 30 µg/kg <sup>a</sup><br>(N=12)<br>n (%) | Total<br>(N=67)<br>n (%) |
|----------------------------------|-----------------------------|---------------------------|----------------------------|-----------------------------|----------------------------|-----------------------------|------------------------------------------|--------------------------|
| <b>Any event</b>                 | 0                           | 0                         | 6 (86)                     | 21 (88)                     | 8 (89)                     | 7 (54)                      | 7 (58)                                   | 49 (73)                  |
| Grade 1                          | 0                           | 0                         | 1 (14)                     | 3 (13)                      | 2 (22)                     | 1 (8)                       | 3 (25)                                   | 10 (15)                  |
| Grade 2                          | 0                           | 0                         | 4 (57)                     | 15 (63)                     | 4 (44)                     | 3 (23)                      | 4 (33)                                   | 30 (45)                  |
| Grade 3                          | 0                           | 0                         | 1 (14)                     | 3 (13)                      | 2 (22)                     | 2 (15)                      | 0                                        | 8 (12)                   |
| Grade 4                          | 0                           | 0                         | 0                          | 0                           | 0                          | 1 (8)                       | 0                                        | 1 (1)                    |
| <b>Infusion related reaction</b> | 0                           | 0                         | 6 (86)                     | 20 (83)                     | 8 (89)                     | 7 (54)                      | 6 (50)                                   | 47 (70)                  |
| Grade 1                          | 0                           | 0                         | 1 (14)                     | 4 (17)                      | 2 (22)                     | 1 (8)                       | 3 (25)                                   | 11 (16)                  |
| Grade 2                          | 0                           | 0                         | 4 (57)                     | 15 (63)                     | 4 (44)                     | 3 (23)                      | 3 (25)                                   | 29 (43)                  |
| Grade 3                          | 0                           | 0                         | 1 (14)                     | 1 (4)                       | 2 (22)                     | 3 (23)                      | 0                                        | 7 (10)                   |
| <b>Anaphylactic reaction</b>     | 0                           | 0                         | 0                          | 1 (4)                       | 0                          | 1 (8)                       | 0                                        | 2 (3)                    |
| Grade 3                          | 0                           | 0                         | 0                          | 1 (4)                       | 0                          | 0                           | 0                                        | 1 (1)                    |
| Grade 4                          | 0                           | 0                         | 0                          | 0                           | 0                          | 1 (8)                       | 0                                        | 1 (1)                    |
| <b>Cytokine release syndrome</b> | 0                           | 0                         | 0                          | 2 (8)                       | 0                          | 0                           | 0                                        | 2 (3)                    |
| Grade 2                          | 0                           | 0                         | 0                          | 1 (4)                       | 0                          | 0                           | 0                                        | 1 (1)                    |

| Preferred Term Severity | 0.6 µg/kg<br>(N=1)<br>n (%) | 3 µg/kg<br>(N=1)<br>n (%) | 10 µg/kg<br>(N=7)<br>n (%) | 30 µg/kg<br>(N=24)<br>n (%) | 45 µg/kg<br>(N=9)<br>n (%) | 60 µg/kg<br>(N=13)<br>n (%) | 30 µg/kg <sup>a</sup><br>(N=12)<br>n (%) | Total<br>(N=67)<br>n (%) |
|-------------------------|-----------------------------|---------------------------|----------------------------|-----------------------------|----------------------------|-----------------------------|------------------------------------------|--------------------------|
| Grade 3                 | 0                           | 0                         | 0                          | 1 (4)                       | 0                          | 0                           | 0                                        | 1 (1)                    |
| <b>Hypersensitivity</b> | 0                           | 0                         | 0                          | 1 (4)                       | 0                          | 0                           | 1 (8)                                    | 2 (3)                    |
| Grade 1                 | 0                           | 0                         | 0                          | 1 (4)                       | 0                          | 0                           | 0                                        | 1 (1)                    |
| Grade 2                 | 0                           | 0                         | 0                          | 0                           | 0                          | 0                           | 1 (8)                                    | 1 (1)                    |

<sup>a</sup>Intensified dosing (Days 1 and 8 in Cycles 1 and 2, with Day 1 only in subsequent cycles)  
Preferred terms from MedDRA v17.1



**Supplementary Table S3. SEA-CD40 DLTs in patients with solid tumors (Part A)**

| <b>Preferred term</b><br>Severity                             | 30 mg/kg<br>(N=2)<br>n | 45 mg/kg<br>(N=2)<br>n | 60 mg/kg<br>(N=2)<br>n |
|---------------------------------------------------------------|------------------------|------------------------|------------------------|
| <b>Infusion related reaction/infusion reaction</b><br>Grade 3 | 1                      | 2                      | 1                      |
| <b>Anaphylactic reaction/anaphylaxis</b><br>Grade 4           | 0                      | 0                      | 1                      |
| <b>Cytokine release syndrome/cytokine release</b><br>Grade 3  | 1                      | 0                      | 0                      |

**Supplementary Table S4. SEA-CD40 PK parameter summaries for dose escalation cohorts in patients with solid tumors (Part A) and lymphomas (Part C)**

|       |                                     |                        | Part A                           |                |                |              | Part C                           |                |                |                |
|-------|-------------------------------------|------------------------|----------------------------------|----------------|----------------|--------------|----------------------------------|----------------|----------------|----------------|
|       |                                     |                        | Dose ( $\mu\text{g}/\text{kg}$ ) |                |                |              | Dose ( $\mu\text{g}/\text{kg}$ ) |                |                |                |
|       |                                     |                        | 10                               | 30             | 45             | 60           | 10                               | 30             | 45             | 60             |
| Cycle | Parameter                           | Statistic <sup>a</sup> |                                  |                |                |              |                                  |                |                |                |
| 1     | AUC <sub>0-last</sub><br>(hr*ng/mL) | N                      | 4                                | 15             | 3              | 9            | 3                                | 3              | 2              | 2              |
|       |                                     | Median                 | 23.9                             | 99.1           | 252            | 335          | 5.61                             | 36.4           | 177            | 457            |
|       |                                     | (Min, Max)             | (5.43, 36.3)                     | (8.02, 435)    | (152, 356)     | (101, 1260)  | (4.64, 6.45)                     | (13.1, 69.3)   | (79.6, 275)    | (253, 662)     |
|       |                                     | GM (CV%)               | 18<br>(100%)                     | 81.7<br>(180%) | 239<br>(45%)   | 352<br>(86%) | 5.52<br>(17%)                    | 32.1<br>(100%) | 148<br>(110%)  | 409<br>(77%)   |
|       | C <sub>max</sub><br>(ng/mL)         | N                      | 4                                | 14             | 2              | 8            | 3                                | 2              | 1              | 1              |
|       |                                     | Median                 | 6.79                             | 12.5           | 14.4           | 22           | 2.8                              | 6.73           | 11.6           | 22.4           |
|       |                                     | (Min, Max)             | (1.61, 16.4)                     | (2.62, 126)    | (13.9, 14.9)   | (7.04, 225)  | (1.27, 4.24)                     | (5.97, 7.49)   | n.a.           | n.a.           |
|       |                                     | GM (CV%)               | 5.82 (130%)                      | 13.5 (140%)    | 14.4 (4.9%)    | 25.7 (150%)  | 2.47 (67%)                       | 6.69 (16%)     | 11.6<br>(n.e.) | 22.4<br>(n.e.) |
|       | t <sub>1/2</sub><br>(day)           | N                      | 0                                | 4              | 1              | 5            | 0                                | 0              | 1              | 1              |
|       |                                     | Median                 | n.e.                             | 4.02           | 10.4           | 3.58         | n.e.                             | n.e.           | 4.05           | 2.53           |
|       |                                     | (Min, Max)             | n.e.                             | (3.3, 5.04)    | n.a.           | (2.28, 4.9)  | n.e.                             | n.e.           | n.a.           | n.a.           |
|       |                                     | GM (CV%)               | n.e.                             | 4.03 (22%)     | 10.4<br>(n.e.) | 3.31 (31%)   | n.e.                             | n.e.           | 4.05<br>(n.e.) | 2.53<br>(n.e.) |
| 2     | AUC <sub>0-last</sub><br>(hr*ng/mL) | N                      | 3                                | 13             | 3              | 7            | 2                                | 1              | 2              | 1              |
|       |                                     | Median                 | 4.89                             | 138            | 281            | 720          | 10.8                             | 53.1           | 297            | 862            |

|                          |                          | Part A                           |              |               |              | Part C       |              |             |              |             |      |
|--------------------------|--------------------------|----------------------------------|--------------|---------------|--------------|--------------|--------------|-------------|--------------|-------------|------|
|                          |                          | Dose (µg/kg)                     |              |               |              | Dose (µg/kg) |              |             |              |             |      |
|                          |                          | 10                               | 30           | 45            | 60           | 10           | 30           | 45          | 60           |             |      |
|                          | (Min, Max)               | (0.305, 11.4)                    | (5.42, 333)  | (110, 518)    | (128, 1520)  | (9.73, 11.9) | n.a.         | (225, 368)  | n.a.         |             |      |
|                          |                          | GM (CV%)                         | 2.57 (590%)  | 83.7 (250%)   | 252 (92%)    | 543 (97%)    | 10.7 (14%)   | 53.1 (n.e.) | 288 (36%)    | 862 (n.e.)  |      |
|                          | C <sub>max</sub> (ng/mL) | N                                | 3            | 13            | 2            | 7            | 2            | 1           | 2            | 1           |      |
|                          |                          | Median                           | 2.83         | 14.4          | 14.7         | 29.7         | 14.2         | 7.68        | 15.7         | 20.1        |      |
|                          |                          | (Min, Max)                       | (1.46, 5.97) | (2.12, 113)   | (10.2, 19.2) | (16.6, 236)  | (9.51, 18.8) | n.a.        | (14.3, 17)   | n.a.        |      |
|                          |                          | GM (CV%)                         | 2.91 (80%)   | 13.4 (160%)   | 14 (47%)     | 41.1 (120%)  | 13.4 (51%)   | 7.68 (n.e.) | 15.6 (12%)   | 20.1 (n.e.) |      |
|                          | t <sub>1/2</sub> (day)   | N                                | 0            | 4             | 2            | 6            | 0            | 0           | 1            | n.e.        |      |
|                          |                          | Median                           | n.e.         | 3.84          | 6.12         | 5.05         | n.e.         | n.e.        | 6.24         | n.e.        |      |
|                          |                          | (Min, Max)                       | n.e.         | (0.909, 5.54) | (3.87, 8.38) | (3.49, 6.96) | n.e.         | n.e.        | n.a.         | n.e.        |      |
|                          |                          | GM (CV%)                         | n.e.         | 2.93 (95%)    | 5.69 (59%)   | 4.8 (28%)    | n.e.         | n.e.        | 6.24 (n.e.)  | n.e.        |      |
|                          | 4                        | AUC <sub>0-last</sub> (hr*ng/mL) | N            | 3             | 10           | 3            | 3            | 1           | 1            | 2           | 1    |
|                          |                          |                                  | Median       | 22.4          | 130          | 77.3         | 628          | 6.08        | 74.8         | 377         | 1000 |
| (Min, Max)               |                          |                                  | (2.96, 37.7) | (52.6, 237)   | (63.4, 210)  | (365, 855)   | n.a.         | n.a.        | (232, 522)   | n.a.        |      |
| GM (CV%)                 |                          |                                  | 13.6 (230%)  | 122 (53%)     | 101 (71%)    | 581 (45%)    | 6.08 (n.e.)  | 74.8 (n.e.) | 348 (63%)    | 1000 (n.e.) |      |
| C <sub>max</sub> (ng/mL) |                          | N                                | 3            | 10            | 3            | 3            | 1            | 1           | 2            | 1           |      |
|                          |                          | Median                           | 4.35         | 20.1          | 12.6         | 27.5         | 3.48         | 4.21        | 22.2         | 37.1        |      |
|                          |                          | (Min, Max)                       | (1.23, 5.17) | (3.74, 71.6)  | (7.25, 15.9) | (3.1, 58.8)  | n.a.         | n.a.        | (9.85, 34.6) | n.a.        |      |

|                    |            | Part A                           |              |            |              | Part C                           |                |                |                |
|--------------------|------------|----------------------------------|--------------|------------|--------------|----------------------------------|----------------|----------------|----------------|
|                    |            | Dose ( $\mu\text{g}/\text{kg}$ ) |              |            |              | Dose ( $\mu\text{g}/\text{kg}$ ) |                |                |                |
|                    |            | 10                               | 30           | 45         | 60           | 10                               | 30             | 45             | 60             |
| $t_{1/2}$<br>(day) | GM (CV%)   | 3.02 (92%)                       | 17.6 (130%)  | 11.3 (42%) | 17.1 (310%)  | 3.48<br>(n.e.)                   | 4.21<br>(n.e.) | 18.5 (110%)    | 37.1<br>(n.e.) |
|                    | N          | 0                                | 2            | 1          | 2            | 0                                | n.e.           | 1              | 1              |
|                    | Median     | n.e.                             | 6.5          | 1.4        | 8.05         | n.e.                             | n.e.           | 4.57           | 3.44           |
|                    | (Min, Max) | n.e.                             | (3.74, 9.27) | n.a.       | (3.58, 12.5) | n.e.                             | n.e.           | n.a.           | n.a.           |
|                    | GM (CV%)   | n.e.                             | 5.89 (71%)   | 1.4 (n.e.) | 6.7 (110%)   | n.e.                             | n.e.           | 4.57<br>(n.e.) | 3.44<br>(n.e.) |

$AUC_{0\text{-last}}$ =average area under the concentration-time curve from time zero to time of last measurable concentration; GM=geometric mean;  $C_{\text{max}}$ =maximum concentration; CV=coefficient variable; n.a.=not applicable; n.e.=not estimable; PK=pharmacokinetics;  $t_{1/2}$ =half life

<sup>a</sup>Patients for whom the SEA-CD40 infusion was stopped early due to an adverse event (full dose not received) were not included in PK parameter statistics. If a full dose was received within 24 hours after interruption,  $AUC_{0\text{-last}}$  and  $t_{1/2}$  but not  $C_{\text{max}}$  were included in PK parameter statistics.

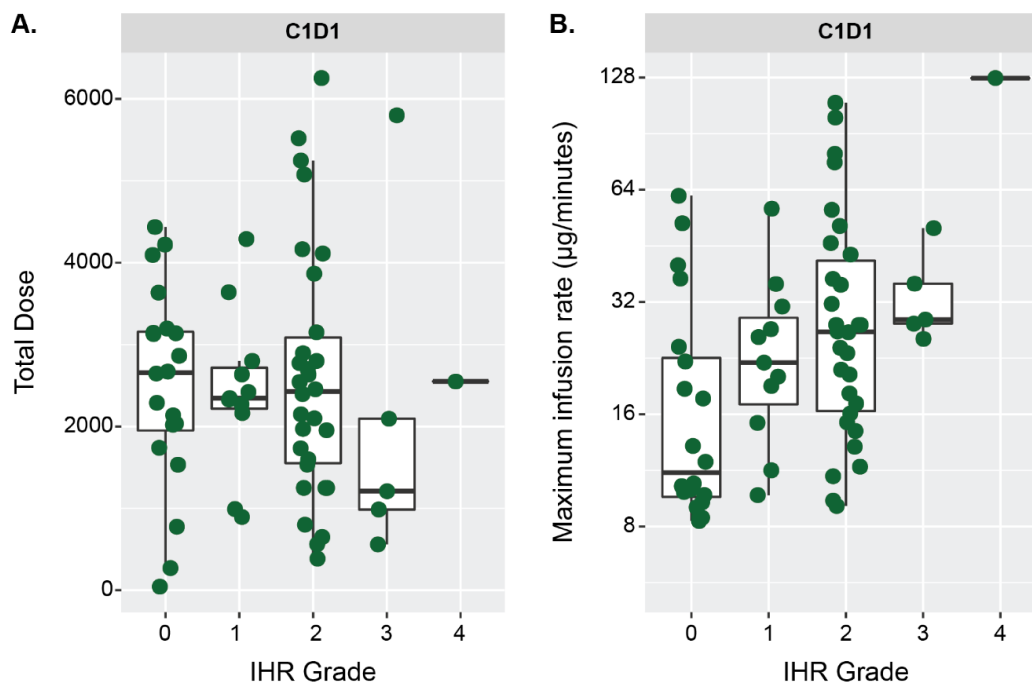

**Supplementary Figure S1: Impact of total dose (A) and infusion rate (B) on observed infusion reactions within 24 hours after first dose.** Analysis of infusion reactions occurring after the first dose was performed to control for effects of potential confounding factors, such as pre-dose medications used after Cycle 1. Patients who did not have any infusion reactions were classified as grade 0 (20 patients). There was no association between the infusion reaction grade and the administered dose (A. Spearman correlation: 0.08,  $P=0.48$ ). There was a significant association between infusion reaction grade and infusion rate (B. Spearman correlation: 0.42;  $P=0.0004$ ).

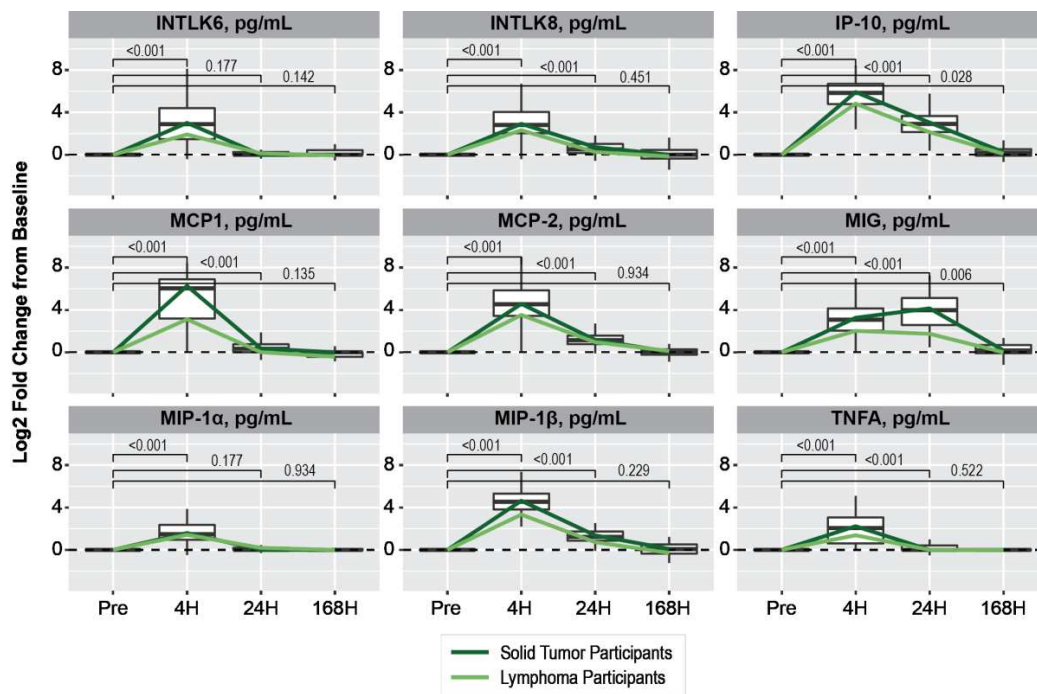

**Supplementary Figure S2: Dynamics of plasma cytokine changes after SEA-CD40 infusion.** Major cytokine changes were generally observed 4 hours after dosing, and levels of plasma cytokines return to baseline 24-168 hours after infusion. Two patients from the lowest dose cohorts of 0.6 and 3  $\mu\text{g}/\text{kg}$ , considered pharmacodynamically inactive, were excluded from the analysis. Data are from Cycle 1. INTLK6, interleukin 6; INTLK8, interleukin 8; IP-10, interferon- $\gamma$ -inducible protein-10; MCP1, monocyte chemoattractant protein-1; MIP-1 $\alpha$ , macrophase inflammatory protein-1 $\alpha$ ; MIP-1 $\beta$ , macrophase inflammatory protein-1 $\beta$ ; TNFA, tumor necrosis factor alpha.

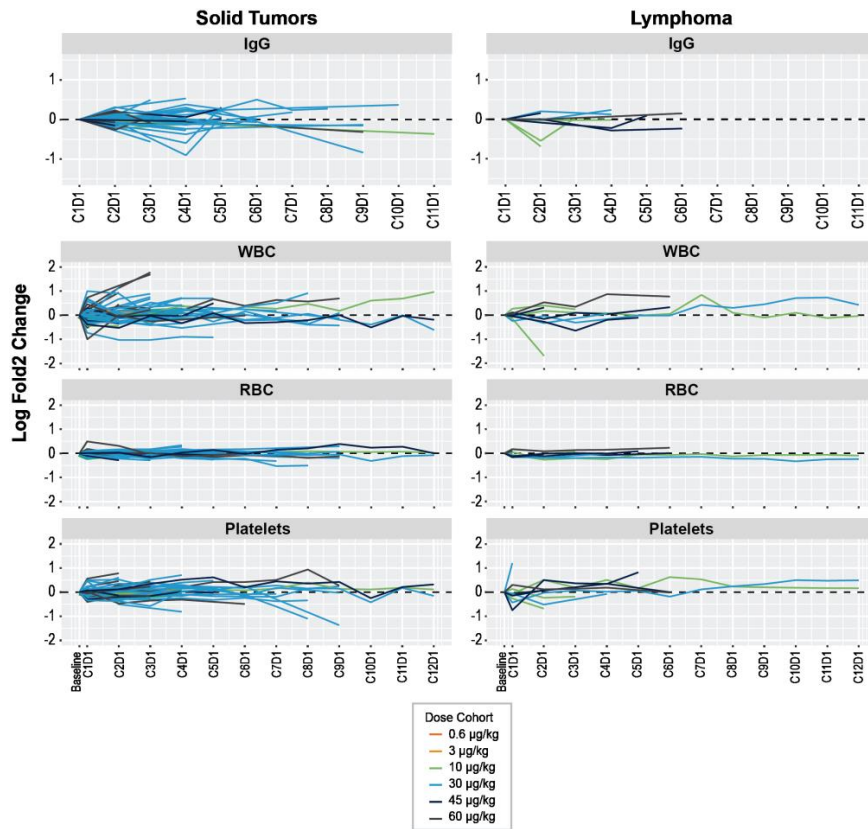

**Supplementary Figure S3: Changes over time in immunoglobulin, WBC, RBCs, and platelets.** Each line represents a single patient and line color represents the dose group. Changes relative to baseline in serum IgG levels and WBC, RBC, and platelet counts in peripheral blood are plotted separately for solid tumor and lymphoma patients. IgG, immunoglobulin G; RBC, red blood cell; WBC, white blood cell
